# Supplementary material
Source: publisher site journal article supplement (https://www.dovepress.com/article/495789)
Supplement: Supplementary file 1 [file get_supplementary_file.php]

**APPENDIX**

**Supplementary Figure 1**

**The Questionnaire**

| *(1) Sociodemographic characteristics of the participants* | | |
| --- | --- | --- |
| Name (Optional) | | ............................... |
| Age | | ............................... |
| Gender: | |  male   female |
| Residential region | |  western region   central region   eastern region   northern region |
| Reason for taking anabolic Sormones |  medical purpose.   non-medical reason (e.g., looking | |
| For medical purpose (please specify the health problem which you have | ............................... | |
| *(2) overall knowledge, practices and patterns of AAS use* | | |
| Anabolic-androgenic steroids |  Testosterone   Growth Hormone   Insulin   Erythropoietin Other.... | |
| Do you take any other supplement |  yes   no | |
| If yes please spacify? |  Aanti-estrogen e.g. (arimidex- nastrazole - nolvadex   Supplements to support liver function such as Legalon Liver Stack   Supplement to support kidney function such as Astrag- Flow Kidney   Prostate health supplements such as Palmetto   Multivitamins   Testosterone booster such as T-bomb | |
| Who advised you to use AAS |  Coaches in sport center   Sports newspapers and magazines   Friends   Seeing athletes on social media.   Seeing the perfect bodies of people | |
| Have you consulted your doctor and done investigational lab test before |  Yes   No | |
| Who does determine the dose of |  Coach   Doctor   Friend | |
| Duration of the used cours |  Below one month   One month   3 months | |
| *(3) Prevalence of side effects experienced by users* | | |
| Have you noticed any side effect after using AAS? |  No   Acne   Hair growth   Alopecia or hair loss.   Gynecomastia   Infertility and impotence   Increase libido   Decrease testicles size.   Enuresis   Aggressive behavior   Psychological disorders e.g depression | |
| Did you visit the doctor when the previous side effect appeared? |  Yes   No | |
| Have you been diagnosed with one of the following diseases after using AAS? |  No, I have not diagnosed   Hypertension   Hypercholesterolemia   Diabetes   Prostate enlargement   Infertility   Liver failure   Kidney failure | |
| When did these health condition appear after using AAS? |  Days after use   Months after use   Years after use | |
| What is the source of your information/knowledge related to hormones? |  Websites and books   Coaches   Friend | |
|  |  Online | |
| Which of the following sources is |  Pharmacies | |
| considered a source for purchasing |  Friend | |
| AAS? |  Sports equipment stores   Coaches | |
|  |  | |

**Supplementary Information 1**

**Description of the blood analysis methods**

Hormones (e.g., Testosterone, LH, FSH, Estradiol)

This investigation used : Immunoassays (e.g., chemiluminescence immunoassay or enzyme-linked immunoassay). Automated analyzer use chemiluminescent technology for quantitative determination.

Units & Ranges:

Testosterone: ng/mL (Males: 2.8–8.0, Females: 0.06–0.8)

LH: IU/L (Adult females: 1.0–95, Males: 1.0–8.4)

FSH: IU/L (Adult females: 3.5–12.5, Males: 1.4–15.4)

Estradiol: pg/mL (Adult females: 30–400, Males: 10–40)

PSA (Prostatic-Specific Antigen)

Principle: Chemiluminescent immunoassay for detection of PSA in serum.

Units & Range: ng/mL (Normal: <4.0)

CBC (Complete Blood Count)

Principle: Automated hematology analyzers using flow cytometry and electrical impedance.

Units & Ranges:

Hemoglobin: g/dL (Males: 13.5–17.5, Females: 12.0–15.5)

Hematocrit: % (Males: 40–54, Females: 36–48)

Liver Function (ALP, ALT)

Principle: Photometric analysis (spectrophotometry) using enzymatic reactions.

Units & Ranges:

ALP: U/L (40–120)

ALT: U/L (7–56)

Kidney Function (Creatinine)

Principle: Photometric analysis using the Jaffe method or enzymatic creatinine assays.

Units & Range: mg/dL (Males: 0.74–1.35, Females: 0.59–1.04)

Electrolytes (Sodium, Potassium)

Principle: Ion-selective electrode (ISE) technology.

Units & Ranges:

Sodium: mmol/L (135–145)

Potassium: mmol/L (3.5–5.0)

Glucose

Principle: Enzymatic methods using glucose oxidase or hexokinase.

Units & Range: mg/dL (Fasting: 70–99)

Albumin

Principle: Photometric analysis using bromocresol green or purple dye-binding assays.

Units & Range: g/dL (3.5–5.0)

Lipid Profile (Cholesterol, LDL, HDL, TG)

Principle: Enzymatic colorimetric methods.

Units & Ranges:

Total Cholesterol: mg/dL (<200)

LDL: mg/dL (<100 optimal)

HDL: mg/dL (>40)

TG: mg/dL (<150)

Thyroid Levels (TSH, T3, T4)

Principle: Chemiluminescent immunoassays.

Units & Ranges:

TSH: µIU/mL (0.4–4.0)

T3: ng/dL (80–200)

T4: µg/dL (4.5–11.2)

Coagulation Profile (PT, PTT)

Principle: Photometric or turbidimetric clot detection using thromboplastin for PT and activated partial thromboplastin reagent for PTT.

Units & Ranges:

PT: seconds (10–13)

PTT: seconds (25–35)

**Supplementary Information 2**

**Declarations and Consent**

Dear participants,

This is a study conducted by a master's student in clinical toxicology at Umm Al-Qura University. The study aims to measure the negative effects and potential changes in the levels of biological parameters and hormones in the blood after the use of anabolic steroids by athletes.

If you are interested, please take a moment to review the questions and provide answers according to your experience. The researchers will treat all information confidentially and use it only for research purposes. Filling out the questionnaire will take 5-8 minutes.

*Do you want to know how your hormones are doing?*

The second step in our research involves collecting blood samples to examine if there are any changes in the levels of hormones and levels of some biological parameters after the use of anabolic steroids.

If you wish to proceed with this step, please contact us by phone or WhatsApp at 0546007993, or leave your phone number, and we will contact you. This laboratory investigation is free of charge.

Your participation is valuable to us. Thank you for your time and cooperation.
